# Supplementary material for: Brain metabolic-functional (de)coupling: from health to glioma dysfunction
Source: Research Square preprint supplement (doi:10.21203/rs.3.rs-5291237/v1), 2024-11-06
Supplement: Supplementary file 1 [file 4acbbc9243dfd2d61c6ca1d3.docx]

**Supplementary Information for: “*Brain metabolic-functional (de)coupling: from health to glioma dysfunction*”**

G. Vallini†, G. Baron†, E. Silvestri, T. Volpi, A. G. Vlassenko, M. S. Goyal, A. Chiuso, D. Cecchin, M. Corbetta, A. Bertoldo*

† ***these authors contributed equally to the work***

**Correspondence and requests for materials should be addressed to Alessandra Bertoldo**

Department of Information Engineering, University of Padova, Padova, Italy

Padova Neuroscience Center, University of Padova, Padova, Italy

E-mail: [alessandra.bertoldo@unipd.it](mailto:alessandra.bertoldo@unipd.it)

<https://orcid.org/0000-0002-6262-6354>

**Supplementary Methods**

**Data acquisition**

For each healthy control (HC), a structural MRI scan was acquired on a Siemens Magnetom Prismafit scanner, with a 3D sagittal T1-weighted magnetization-prepared 180° radio-frequency pulses and rapid gradient-echo multi-echo sequence (TE = 1.81, 3.6, 5.39, 7.18 ms, TR = 2500 ms, TI = 1000 ms and voxels size of 0.8×0.8×0.8 mm3). The final T1-weighted image was obtained by averaging the first two echoes1. Dynamic PET acquisitions (60 minutes) were performed following an intravenous bolus injection of 187.7 ± 12.1 MBq and reconstructed by filtered back-projection (ramp filter, 5 mm FWHM).

Patient data were acquired on a 3T Siemens Biograph PET/MR scanner. Anatomical images comprised a T1-weighted (T1w) 3D magnetization-prepared rapid gradient-echo acquisition (TE=3.24 ms, TR=2400 ms, TI=1000 ms, FA=8°, FOV=256×256 mm, voxel size=1×1×1 mm3) acquired both before and after contrast agent injection, a 3D T2-weighted image (TR=3200 ms, TE=535 ms, FOV=256×256 mm, voxel size=1×1×1 mm3) and a 3D fluid attenuation inversion recovery image (TR=5000 ms, TE=284 ms, TI=1800 ms, FOV=256×256 mm, voxel size=1×1×1 mm3). Dynamic PET acquisitions (60 minutes) were performed following an intravenous bolus injection of 203 ± 40 MBq and images were reconstructed using the OSEM algorithm from list-mode data.

**Cortical atlas definition**

The cortical parcellation employed in this study comprises 74 regions derived from the Yan 100-area atlas2, which builds upon the Schaefer atlas3, extending it to a new set of homotopic, area-level divisions that can more effectively capture the symmetric brain uptake of glucose4.

The decision to cluster the original atlas stems from the necessity to maintain the computational load of sparse DCM at a manageable level5. The clustered atlas was created by merging areas that were already functionally grouped in the atlas, as detailed by Baron et al.6, while keeping other areas separate. Specifically, a consensus clustering procedure, similar to that described by Ryali et al.7, was employed to reduce the number of cortical parcels derived from the Yan atlas. This framework employs both base and consensus clustering methods to achieve robust and stable clusters. Initially, various groupings are generated for each individual dataset using a base clustering method. Then, consensus clustering is applied to these groupings to produce stable clusters across individuals. To account for hemodynamic differences across spatially distant parcels, this procedure is selectively performed on subsets of adjacent cortical regions within the same functional network. This additional constraint ensures that only functionally homogeneous and spatially contiguous parcels are grouped together.

For sets composed of only two contiguous ROIs, the objective criteria for determining the optimal number of clusters cannot be applied. In these cases, grouping is performed if the pair Pearson’s correlation is, on average, greater than the mean correlation within other clusters. This approach ensures the hemodynamic consistency of each cluster, reflecting the whole-brain vascular complexity8,9.

The CIFTI files corresponding to the obtained functional parcellations are available at this link: <https://github.com/FairUnipd/ConsensusClustering-YanAtlas>.

**Tissue binary masks**

A threshold of 0.8 was applied to the SPM12 (v7219 <https://www.fil.ion.ucl.ac.uk/spm/>) probability maps to generate binary masks for grey matter (GM), white matter (WM), and cerebrospinal fluid (CSF). Specifically, the binary GM mask is utilized for extracting PET TACs of voxels and region-level standardized uptake value ratio (SUVR) values, therefore the chosen segmentation is intentionally conservative, resulting in a mean sample TAC that effectively reduces partial volume effects (PVEs)10, while still maintaining a sufficient number of voxels. On the other hand, to create the reference region mask for SUVR calculation, the binary mask for WM was applied to the cerebellum region (defined according to the AAL2 atlas).

**EC Matrices Extraction**

As discussed in11, the kinetic energy of functional information flow can be decomposed into dissipative and non-dissipative components, corresponding to the emergence of the curl-free dissipative and divergence-free solenoidal contributions, respectively. As demonstrated in a recent work12, these two energetic flow components are statistically derived from effective connectivity (EC) in a closed-form. More specifically, when the Hurwitz stability of 𝐴 (i.e., the EC matrix) is granted, it may be decomposed as follows13:

|  |  | (1) |
| --- | --- | --- |

On one hand, the matrix 𝛴𝑤 (i.e., the differential auto-covariance11) corresponds to the positive definite stationary form of the matrix 𝑄 defined in5, namely, . Since we assumed uncorrelated noise across nodes, where represents the variance of each brain endogenous fluctuations and is the identity matrix of size . On the other hand, the inverse of the covariance matrix (also known as precision matrix) derives from inverting the steady-state covariance matrix defined as:

|  |  | (2) |
| --- | --- | --- |

for which the algebraic Lyapunov equation holds13:

|  |  | (3) |
| --- | --- | --- |

As extensively discussed in Liégeois and collegues, is related to the pairwise partial covariance between each pair of neural nodes, since it captures only “direct” statistical dependencies by discarding the effects of mediators14, thus relating to the dissipative component of the functional flow 11. In other words, a value close to zero in indicates that two regions are conditionally independent given the rest of ROIs15. Particularly, here is called 16.

While and are both symmetric, the asymmetry of relies on the nature of the skew-symmetric matrix , thus introducing a solenoidal regime in the energy landscape of brain functional dynamics associated with the non-dissipative component of the functional flow's kinetic energy11. Since Equation (1) mathematically parametrizes all EC matrices that give the same for any matrix , this defines a one-to-one mapping between and given , thus leading to compute as:

|  |  | (4) |
| --- | --- | --- |

In statistical terms, can be referred to as the differential cross-covariance matrix17, meaning that any out-diagonal element of can be expressed as . It follows that the time-lag covariance matrix provides a direct interpretation of which node behaves as a source and which as a sink17. Specifically, if > 0 (and < 0 for the skew-symmetry of ), the node j is considered as source, meaning that information is flowing from node j to node i. Furthermore, this statistical interpretation provides a straightforward method to ascertain the sender or receiver nature of each neural node. By summing the values of matrix column-wise, we can quantify the extent to which each node predominantly functions as a source (positive sum) or a sink (negative sum)11.

As a result, the decomposition of each within-subject EC matrix yielded a partial covariance matrix (encoding the dissipative component) and a differential cross-covariance matrix (encoding the solenoidal component).

**Within-individual metabolic connectivity**

Within-individual metabolic connectivity (wi-MC) matrices were calculated using a method based on Euclidean Similarity (ES), detailed in Volpi et al.18. For each pair of TACs, and , their Euclidean distance is calculated:

|  | with = number of time points | (5) |
| --- | --- | --- |

A measure of ES is obtained as 1 minus the normalized , i.e., divided by the maximum distance between TAC pairs (scaled in the [0, 1] interval). Due to the heavy-tailed distribution of the ES values, a Fisher z-transformation was applied, followed by a new rescaling of the values in the [0, 1] interval. A wi-MC matrix was calculated for all participants, both HCs and patients.

**Partial Least Squares Correlation (PLSC) analysis**

The implementation of the Partial Least Squares Correlation (PLSC) analysis was facilitated by the myPLS toolbox in MATLAB 2021b, which is publicly accessible at <https://github.com/danizoeller/myPLS> and closely followed the modelling procedure outlined in Griffa et al.,19 for FC-related features projected on structural harmonics.

For each latent dimension, the PLSC analysis produced effective and metabolic PLSC *salience maps*, representing the left and right singular vectors of the data covariance matrix (i.e., correlation matrix when *X* and *Y* are normalized and centered) obtained through singular value decomposition:

|  | (6) |
| --- | --- |
|  | (7) |

Where is the correlation matrix, while and represent the effective and metabolic saliences, respectively.

Additionally, it produced sets of brain and cognitive latent *scores* and , corresponding to data projections onto the brain and cognitive saliences, such that the covariance between each pair of

|  | (8) |
| --- | --- |
|  | (9) |
|  | (10) |

latent vectors (i.e., the l-th column of and ) is maximized:

where and , while and are the lth of and , respectively20.

Moreover, the PLSC analysis yielded a collection of effective and metabolic *loadings*, representing Pearson’s correlations between the original variables and the latent scores:

|  | (11) |
| --- | --- |
|  | (12) |

To quantify the amount of functional measure variance explained by the metabolic counterpart within the new latent space, Pearson's correlation between the latent scores of each PLSC pair was used. Additionally, before to apply PLSC functional measures were normalized to the range [-1, 1], while metabolic measures were scaled to the range [0, 1]. Specifically, this approach allows us to treat as the dissipative component and as the solenoidal component by disregarding the multiplication factor σ²/2 and 1/2, respectively. Furthermore, to ensure consistency in the variability range across participants and features, thus facilitating meaningful comparisons during the analysis, we applied z-score scaling across both directions.

**Assessment of the impact of different acquisition scanners**

The comparative analysis between healthy controls and patients presupposed the equivalence of effective and metabolic measures in terms of data quality and reliability. Given that PET and MRI acquisitions were conducted on different scanners for the two groups, we investigated the potential impact of these protocol variations on the results. To address this concern, we evaluated the temporal signal-to-noise ratio (tSNR) for fMRI data, a metric commonly computed as the ratio between the region of interest (ROI)-wise mean signal and standard deviation21. For each participant, we calculated ROI-level tSNR values and subsequently conducted a two-sided Mann-Whitney rank sum test to compare these values between HCs and patients, employing a significance level of α=0.01 and applying the Holm-Bonferroni correction for multiple comparisons. To mitigate potential influences from individual variability associated with pathology rather than scanner differences, we performed the non-parametric test through 1000 iterations. In each iteration, we randomly sampled two subsets (each representing 1/3 of the original cohorts) and identified regions exhibiting significant tSNR differences for more than 75% of the iterations.

Additionally, a scanner sensitivity analysis was conducted on the PET data. We calculated the contrast-to-noise ratio (CNR) for each participant in both groups (HCs and patients) by determining the ratio of mean PET signal in grey matter to mean PET signal in white matter from the static PET data (40-60 min). This choice aligns with the work of Volpi and collegues18, which suggests that MC matrices, derived from the Euclidean Similarity method, are primarily dependent on the latter part of the curves (40-60 min). Additionally, analyzing this part of the signal allows us to also evaluate the impact of the scanner on SUVR, which is computed on these late frames.

**Analysis of Involved White Matter Tracts in the glioma group**

To assess which tracts are primarily involved in the lesions of “outlier patients” (outside the normal range) compared to “pseudo-healthy patients” (within the expected range) for each coupling, we used the probabilistic tract maps provided by the BCBToolkit22.

We applied an 80% threshold to the probabilistic maps to ensure a conservative assessment of tract presence. Next, we evaluated the potential overlap between the patient's tumor map and the thresholded tract map. A tract was considered involved if more than 20% of the tumor mask intersected with the tract mask. Finally, we calculated for each tract the percentage of outlier patients and pseudo-healthy patients having that tract involved.

**Supplementary Tables**

**Supplementary Table 1 Generalizability of the multivariate correlation patterns**

|  | *Pair* | *LC* | *Corr(Lx, Ly)* | *Gen. X* | *Gen. Y* |
| --- | --- | --- | --- | --- | --- |
| *Upper triangular portion* | **- MC** | **1** | **0.7435**  **(p-value < 0.001)** | **0.9991** | **0.8882** |
| S - MC | 1 | 0.8054  (p-value < 0.001) | 0.9966 | 0.4475 |
| *Strength - SUVR* | - SUVR | 2 | 0.8030  (p-value < 0.001) | 0.8378 | 0.4335 |
| **S - SUVR** | **2** | **0.6373**  **(p-value < 0.001)** | **0.9478** | **0.7119** |

**Supplementary Table 2 Patients’ demographics and clinical data**

| *Age (years)* | 58.8 ± 14.9 |
| --- | --- |
| *Gender* |  |
| Female | 19 |
| Male | 24 |
| *Tumor Histology* |  |
| Astrocytoma | 2 |
| Diffuse astrocytoma | 1 |
| Glioblastoma | 29 |
| Gliosarcoma | 1 |
| Glioneural neoplasm | 2 |
| Oligodendroglioma | 1 |
| Other | 7 |
| *Tumor grade* |  |
| II | 6 |
| III | 3 |
| IV | 30 |
| n.a. | 4 |
| *IDH1 mutation status* |  |
| Wild-type | 26 |
| Mutated | 7 |
| n.a. | 10 |
| *Tumor site* |  |
| Left | 24 |
| Right | 15 |
| Bilateral | 4 |

**Supplementary Figures**


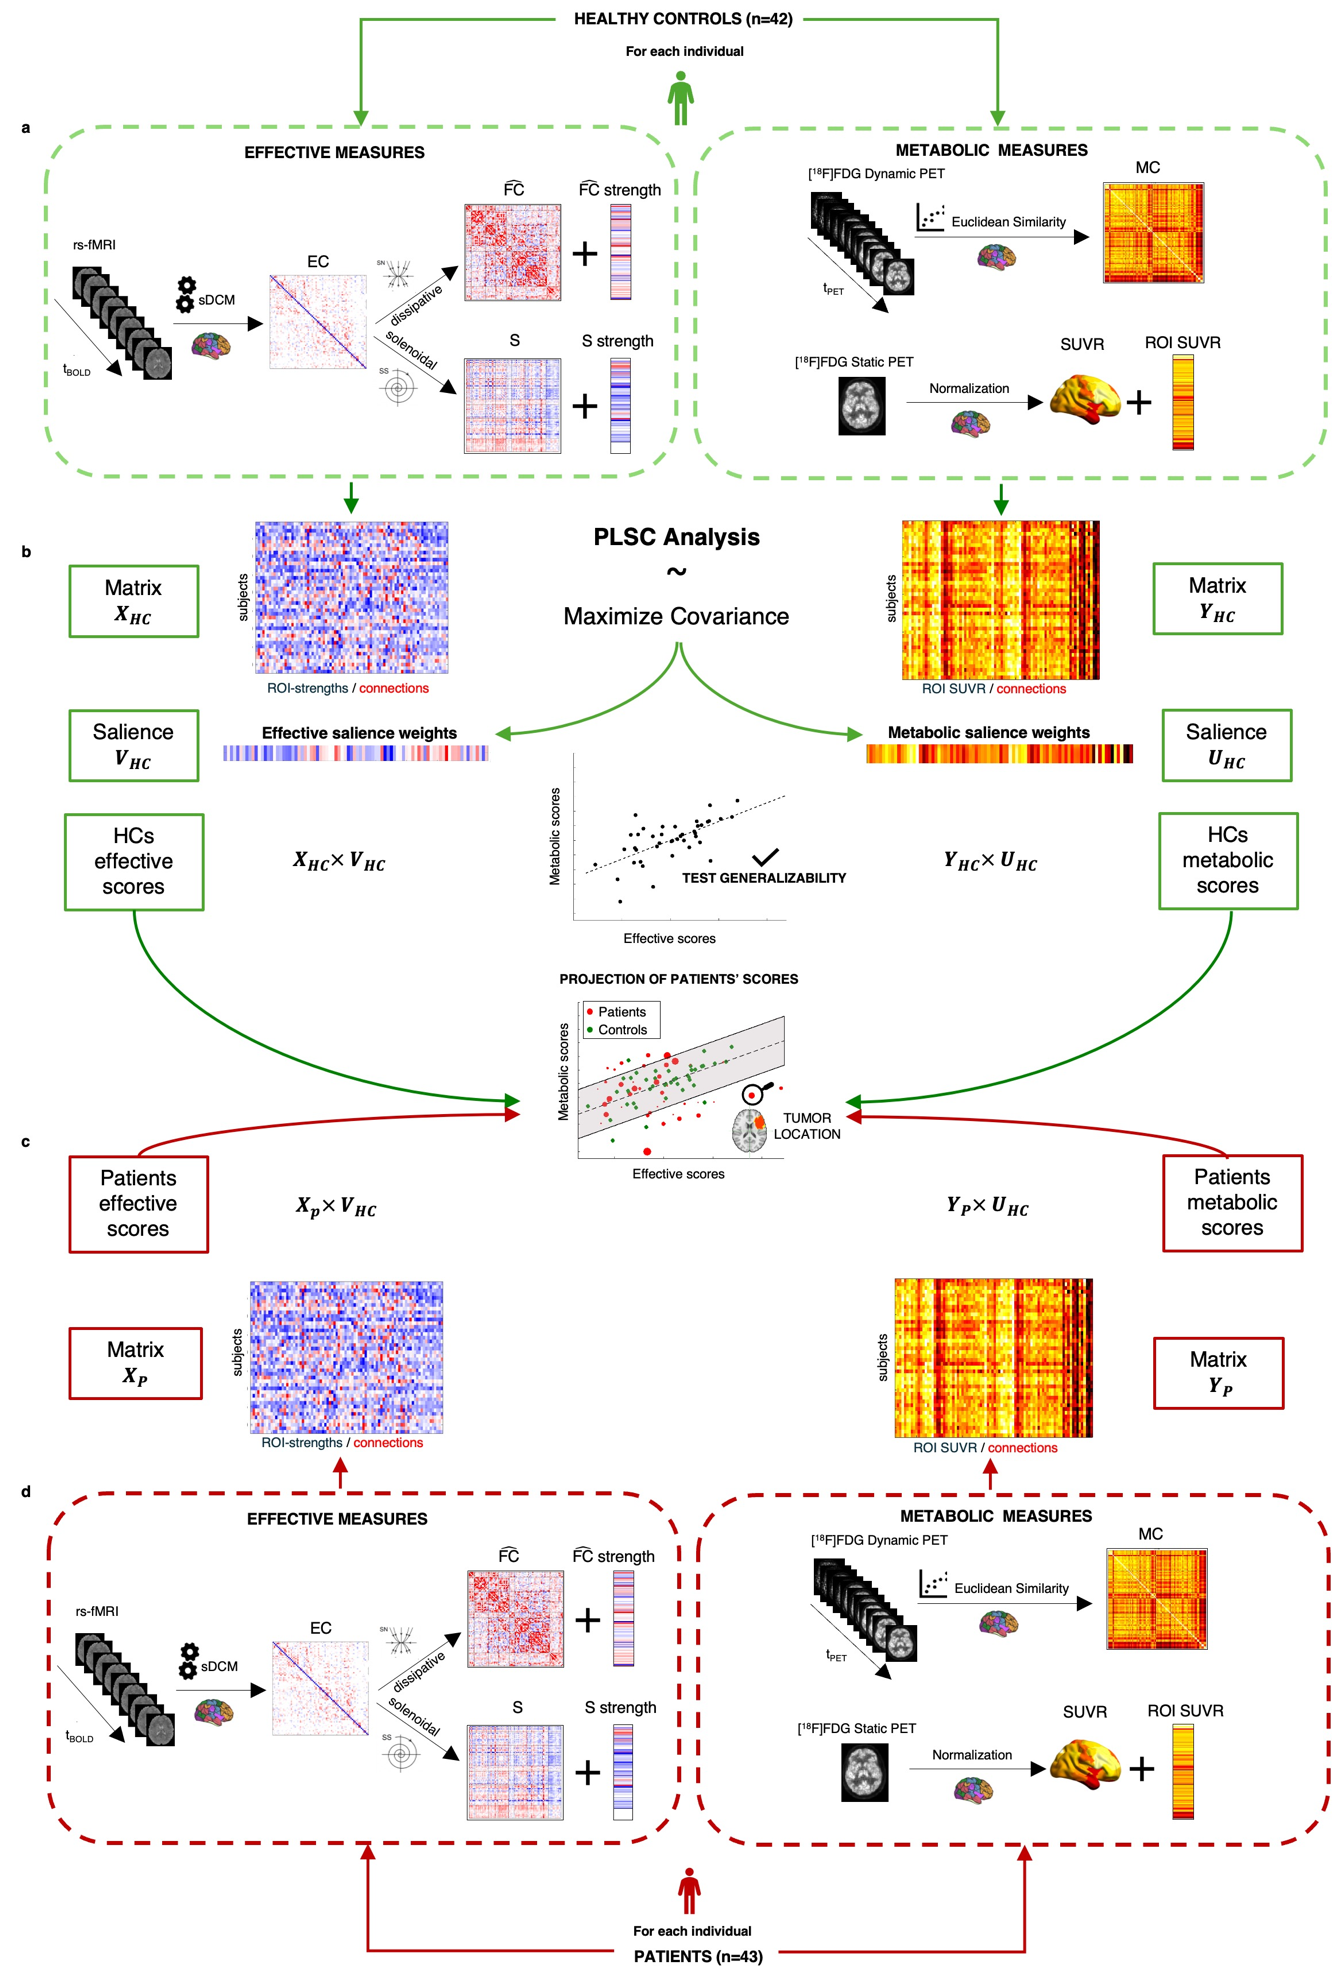


**Supplementary Fig. 1** **Workflow of the main analyses performed in the study.** (**a**) For each healthy control, regional SUVR and MC were extracted after projecting both static and dynamic PET data on the considered atlas; conversely, whole-brain flow patterns and S are obtained from the individual EC matrix, after projecting rs-fMRI data on the parcellation atlas and applying sDCM at subject-level. Node strength profiles were considered for comparison with regional SUVR. (**b**) PLSC was applied to each effective-metabolic pair (i.e., –SUVR; S–SUVR; –MC; S–MC) after defining group-level X and Y, thus yielding the corresponding latent scores and salience weights. For each PLSC pair, a generalizability test was conducted to select significant pairs for further application on the glioma patients. (**c**) Metabolic and effective variables were extracted from each patient by employing the same procedure described in step (**a**). (**d**) After feature normalization, effective and metabolic measures were projected onto the maximizing-covariance latent space for each generalizable pair identified in the HC sample. Finally, after defining the normality range, we investigated the spatial pattern of tumor location in patients for which the effective-metabolic coupling deviates from the expected healthy trend (i.e., latent scores outside the normality range).


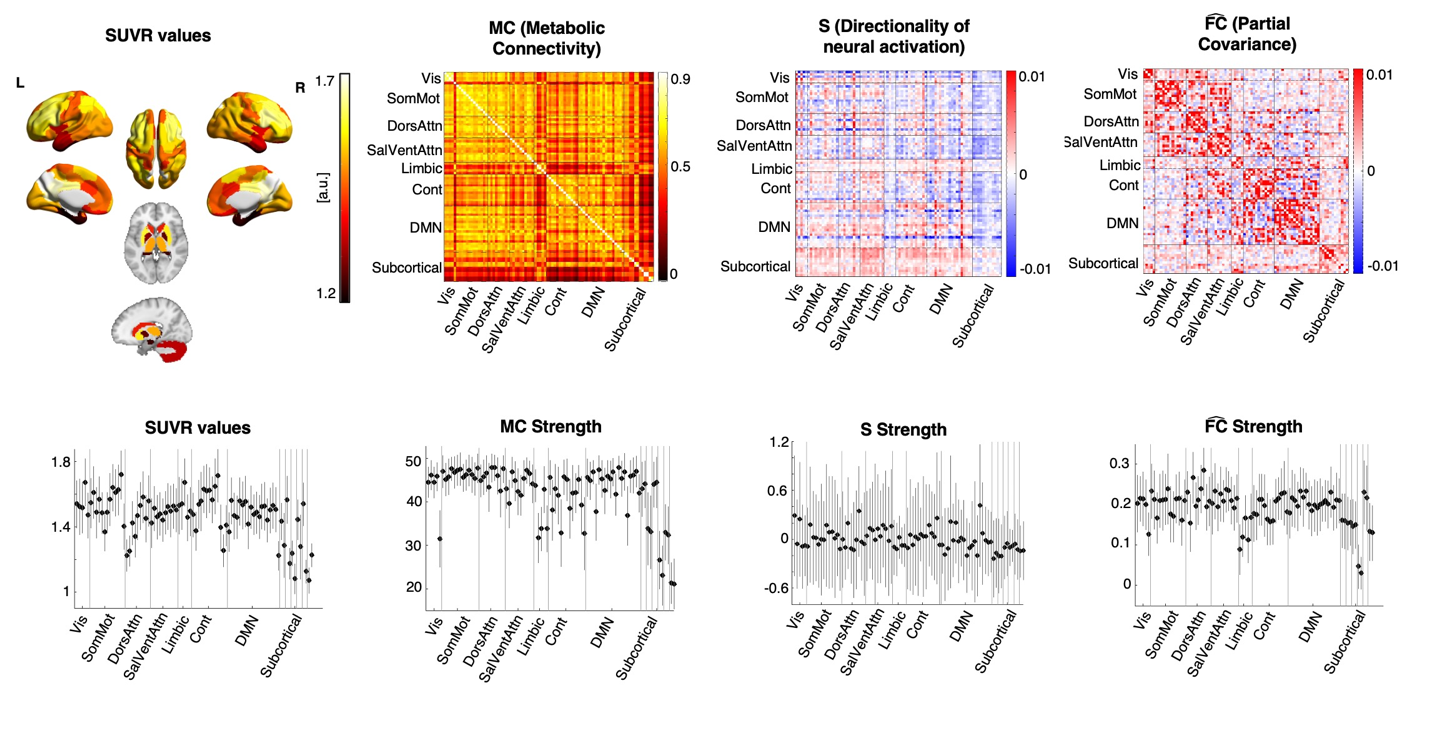


**Supplementary Fig. 2** **Group-averaged metabolic and effective measures.** From the left: ROI-level SUVR and ROI-level distribution of SUVR values; metabolic connectivity matrix (MC) and distribution of column-wise strength for MC; differential cross-covariance matrix (S) and distribution of column-wise strength for S; partial covariance () and distribution of column-wise strength for . Given the inherently high inter-individual variability characterizing the magnitude of covariance matrices, we implemented individual-level normalization (i.e., edge-wise division by the Frobenius norm) before averaging to enhance visualization.


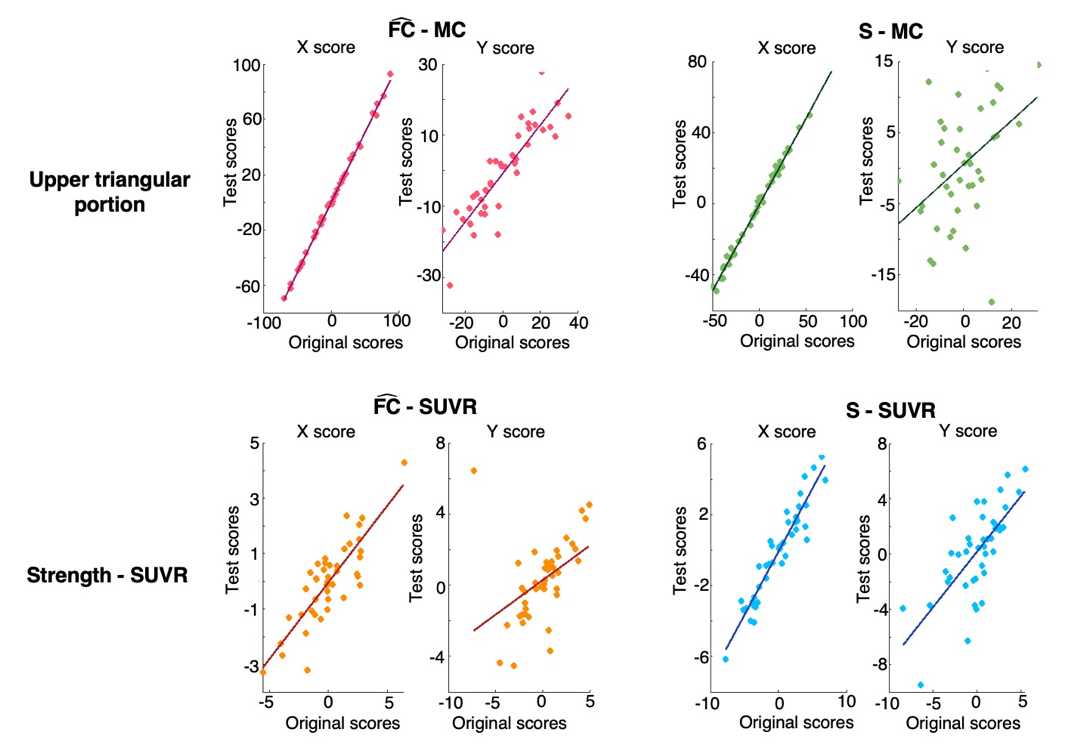


**Supplementary Fig. 3** **Scatter plots representing original vs test latent scores from the 7-fold cross-validation procedure.** For each possible coupling pair, X are effective features, while Y metabolic features latent scores. Pearson’s correlations between original and test latent scores are reported in **Supplementary Table 2**. In the case of generalizable PLSC pattern, one expects that original and test latent scores align along the identity line (i.e., correlation greater than 0.5).


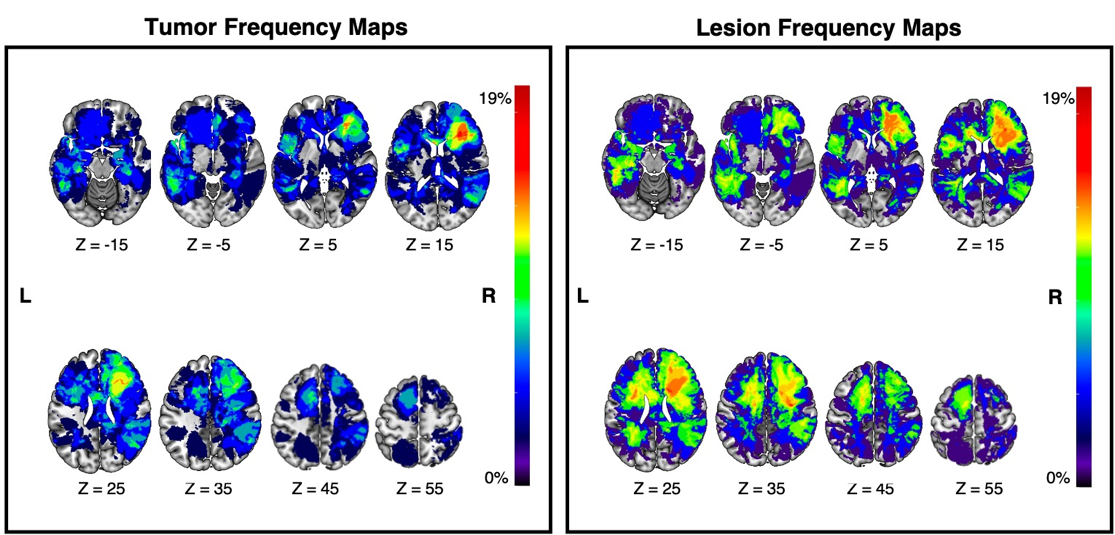


**Supplementary Fig. 4** **Tumor and lesion frequency topography across patients.** Frequency maps showcasing tumor TM (left panel) and lesion TM+E (right panel) for 43 patients. The left panel focuses solely on the tumor core and necrosis, while the right panel encompasses all lesion areas. Each representative frequency map is generated by overlaying individual binary masks and normalizing by the sample size. Notably, the frequency maps reveal a sparse distribution, with tumors primarily affecting the right frontal and temporal lobes. Spatial overlap is limited, with a maximum overlapping value of 19%.


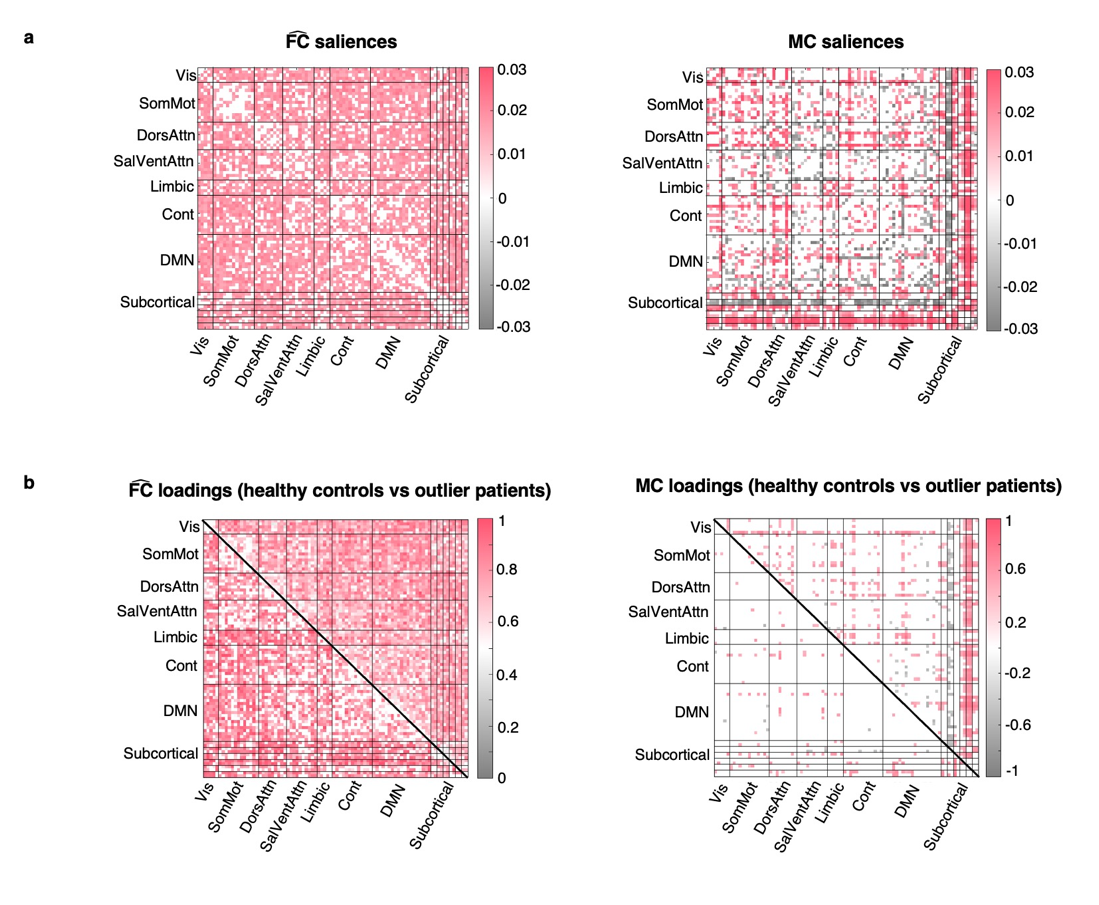


**Supplementary Fig. 5 –MC PLSC salience and loading entries matrices.** (**a**) and MC salience pattern. (**b**) and MC loading maps computed in the HC sample (upper triangular portions) and the group of outlier patients (lower triangular portion). In both saliences and loadings, only the robust weight values are highlighted (i.e. entry-wise absolute bootstrap ratio > 3).


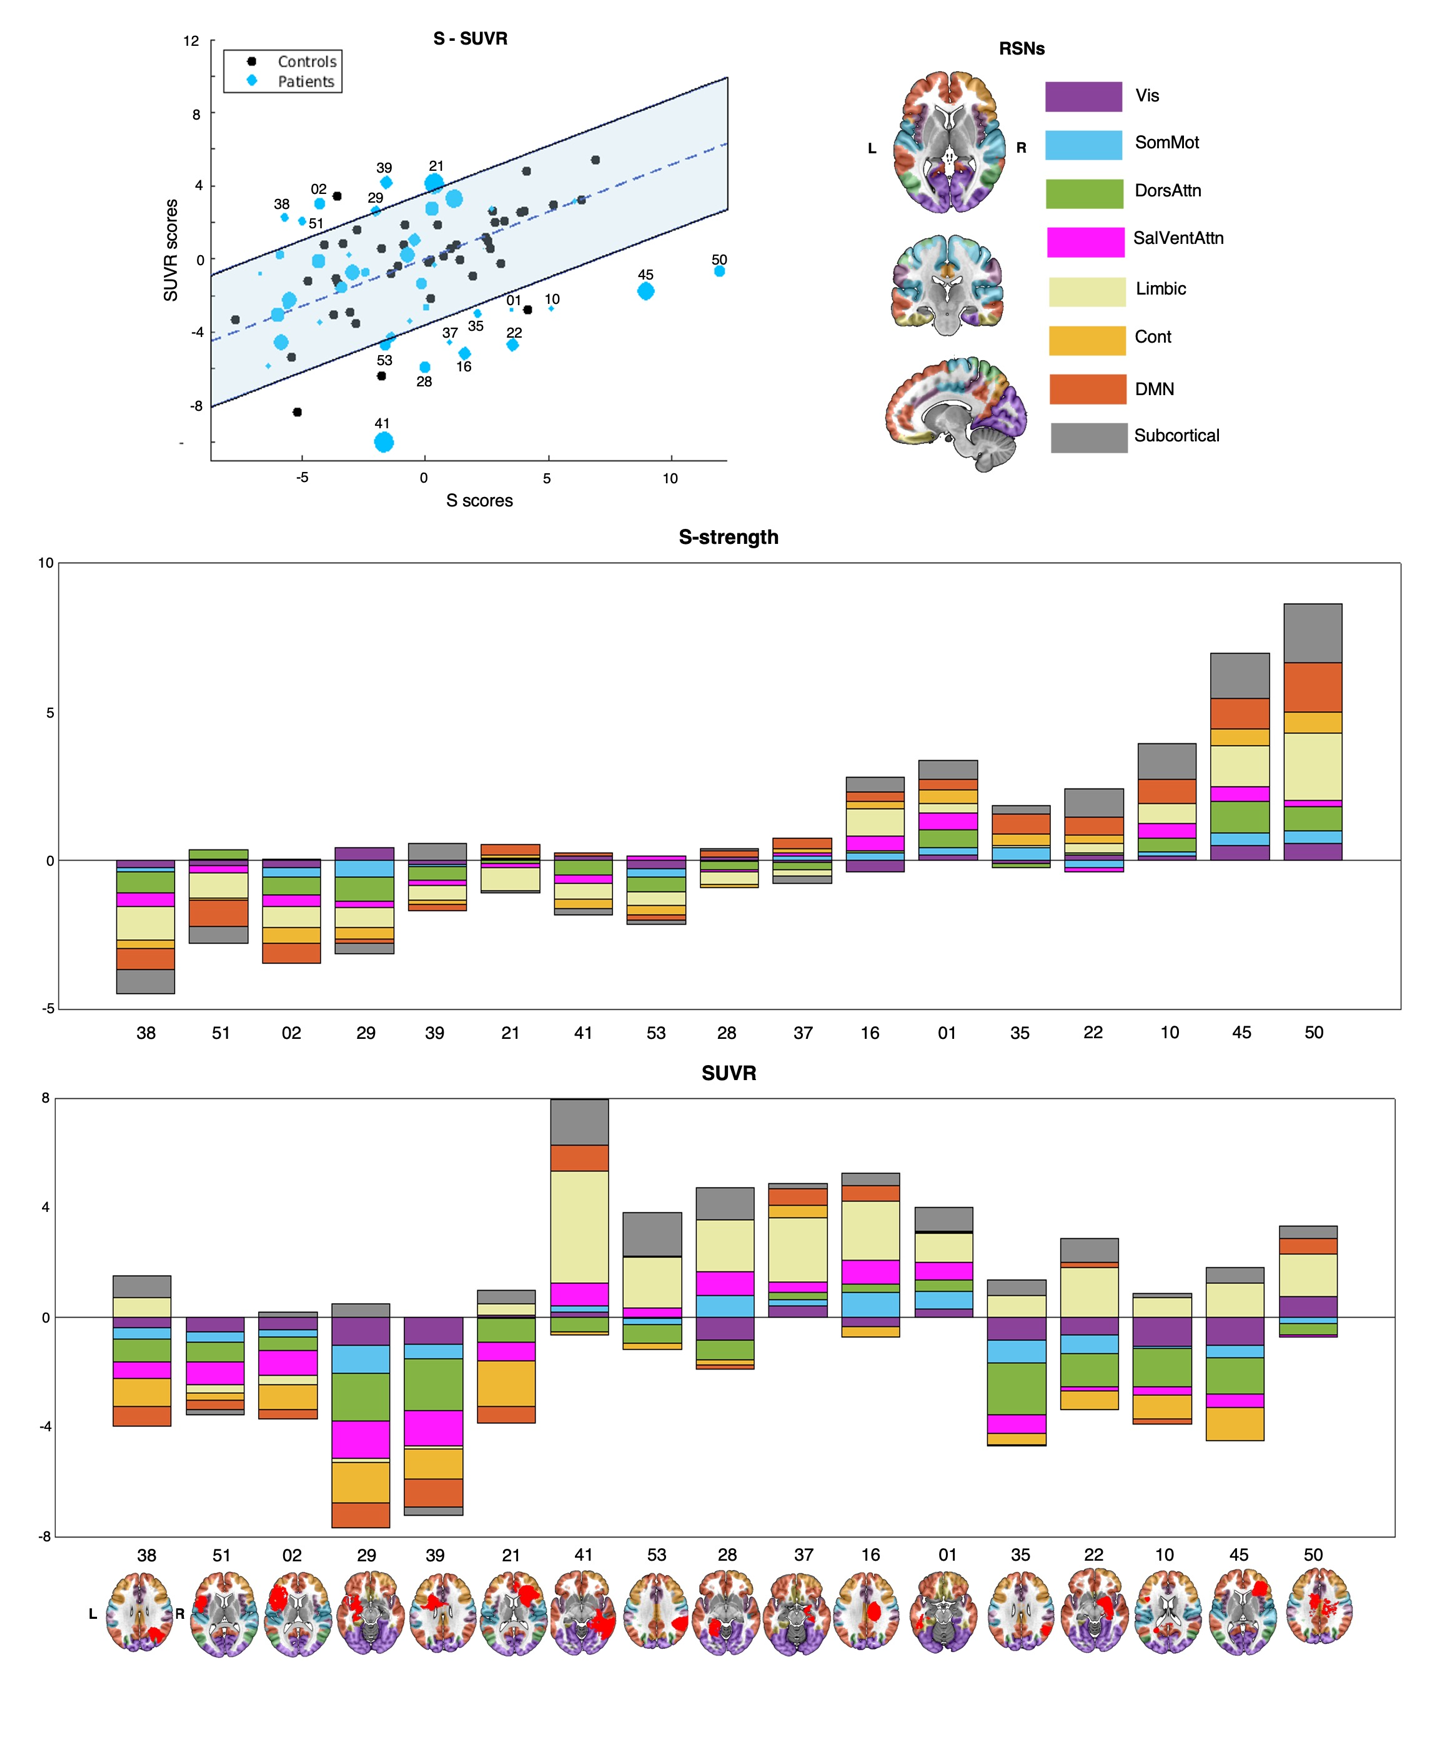


**Supplementary Fig. 6** **S-strength a SUVR values (z-scored with respect to healthy controls) for each outlier patient.** S-strength values for each outlier patients are displayed in the upper panel, while the SUVR values are shown in the lower panel. Additionally, an axial slice indicating the lesion in red is provided. On the slice, the different RSNs are also highlighted in different colors. In both cases only the regions with a significance PLSC salience are considered in each RSN.


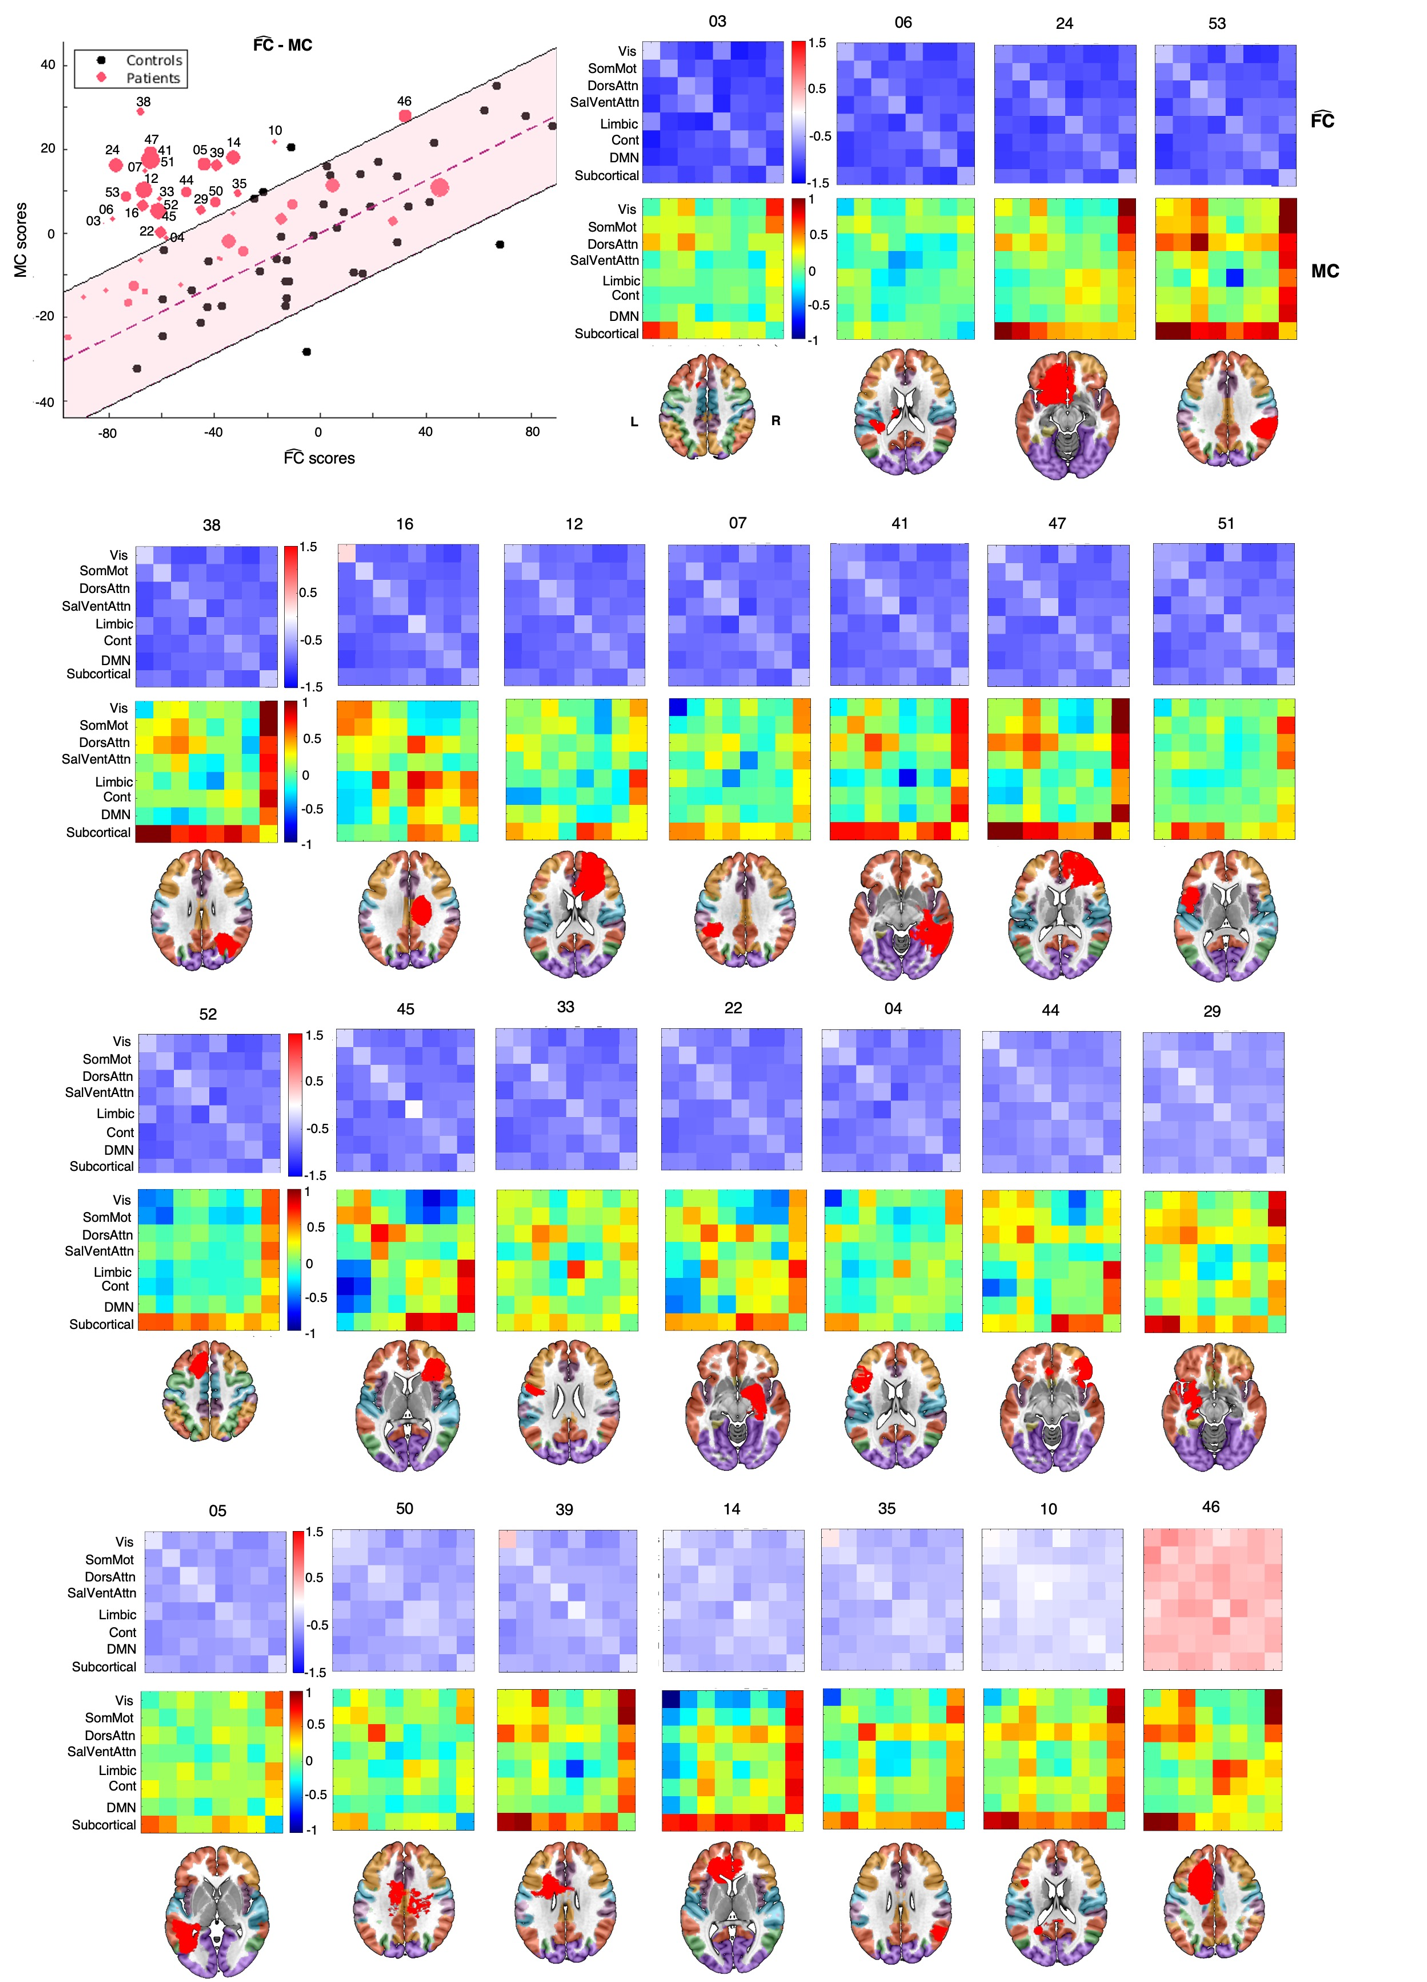


**Supplementary Fig. 7**  **and MC matrices (z-scored with respect to healthy controls) for each outlier patient.** The matrix is displayed in the upper part, while the MC matrix is shown in the lower part. Additionally, an axial slice indicating the lesion in red is provided. On the slice, the different RSNs are also highlighted in different colors (see **Supplementary Fig. 6**). In both cases, the matrices are block-structured, and the average value in each block is reported, considering only the entries with significant salience.


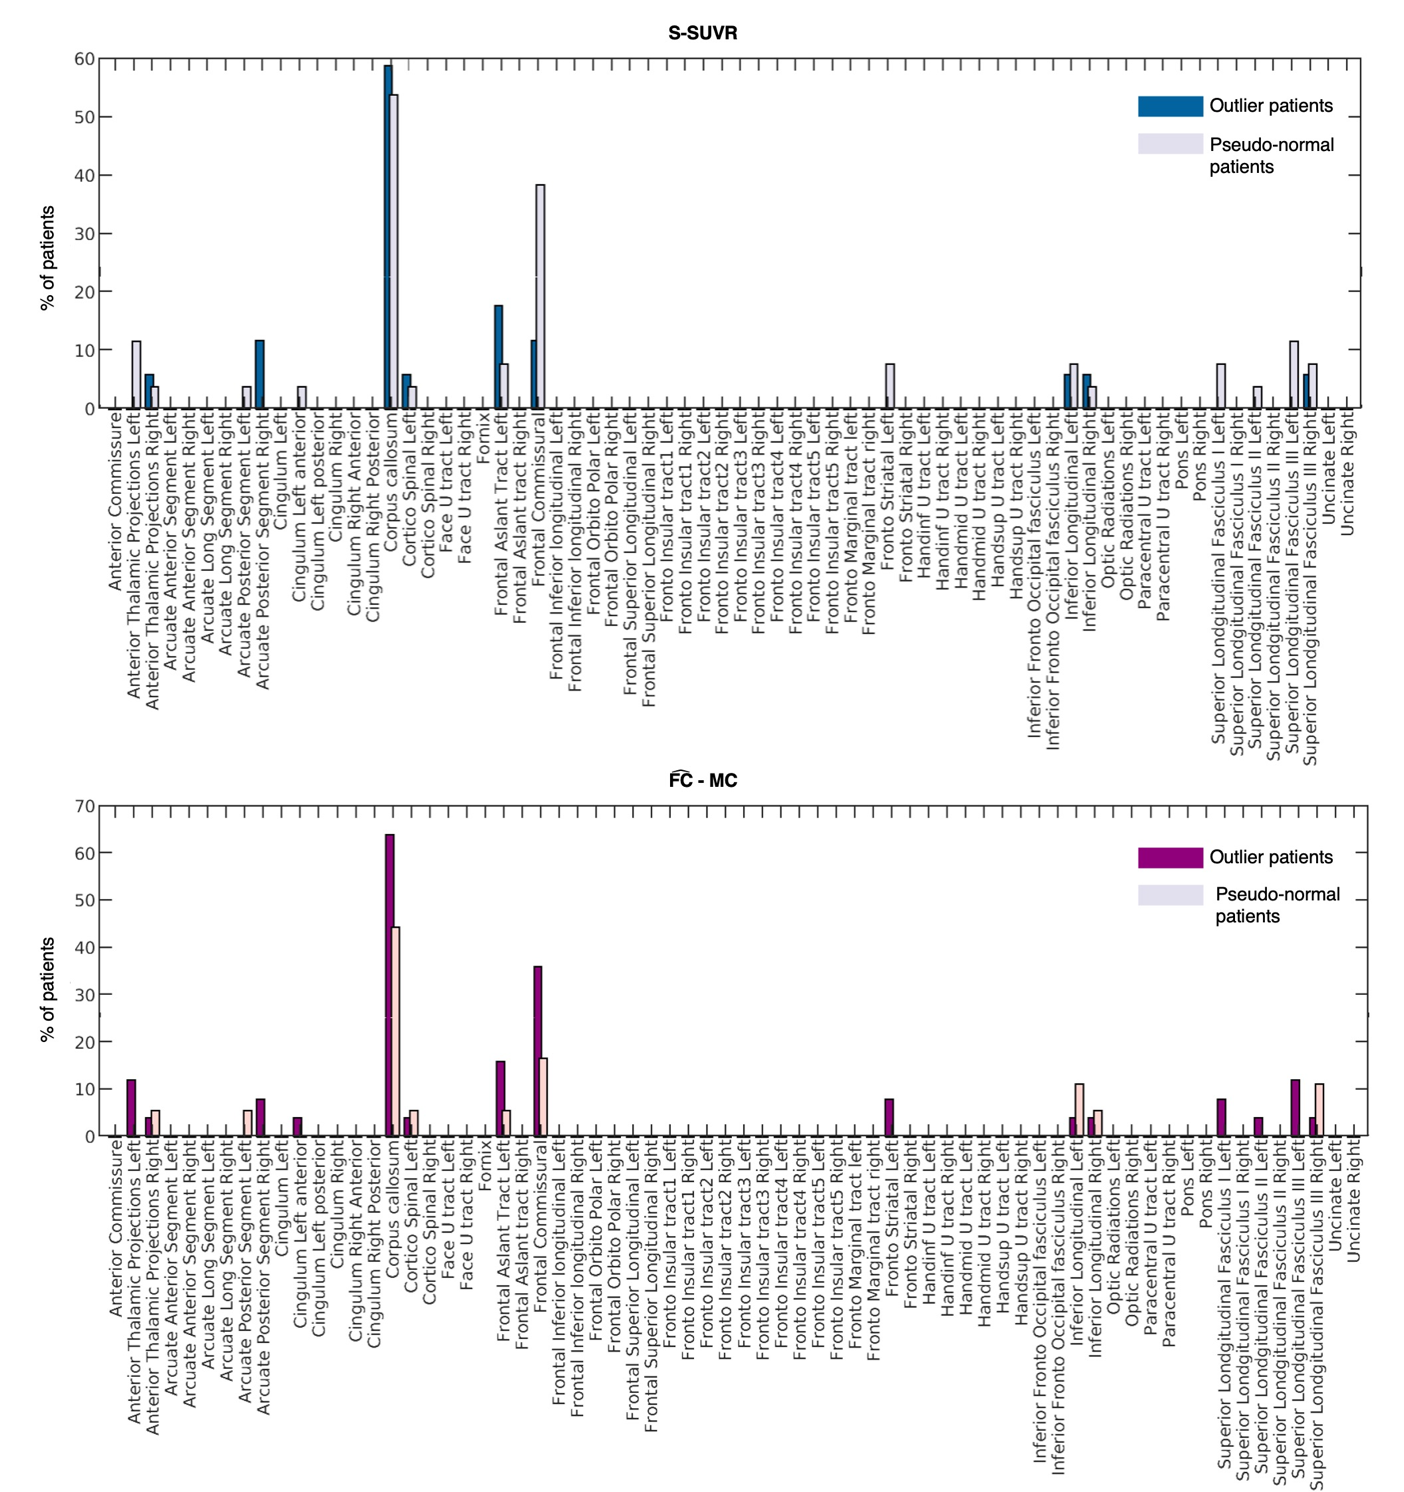


**Supplementary Fig. 8** **For each tract, calculated the percentage of outlier patients and pseudo-healthy patients with the specific tract involved.** (Upper panel) For the S–SUVR coupling, the percentages of patients with the tract involved in the tumor mask are reported for both outlier patients and pseudo-healthy patients. (Lower panel) For the –MC coupling, the percentages of patients with the tract involved in the tumor mask are reported for both outlier patients and pseudo-healthy patients.

**
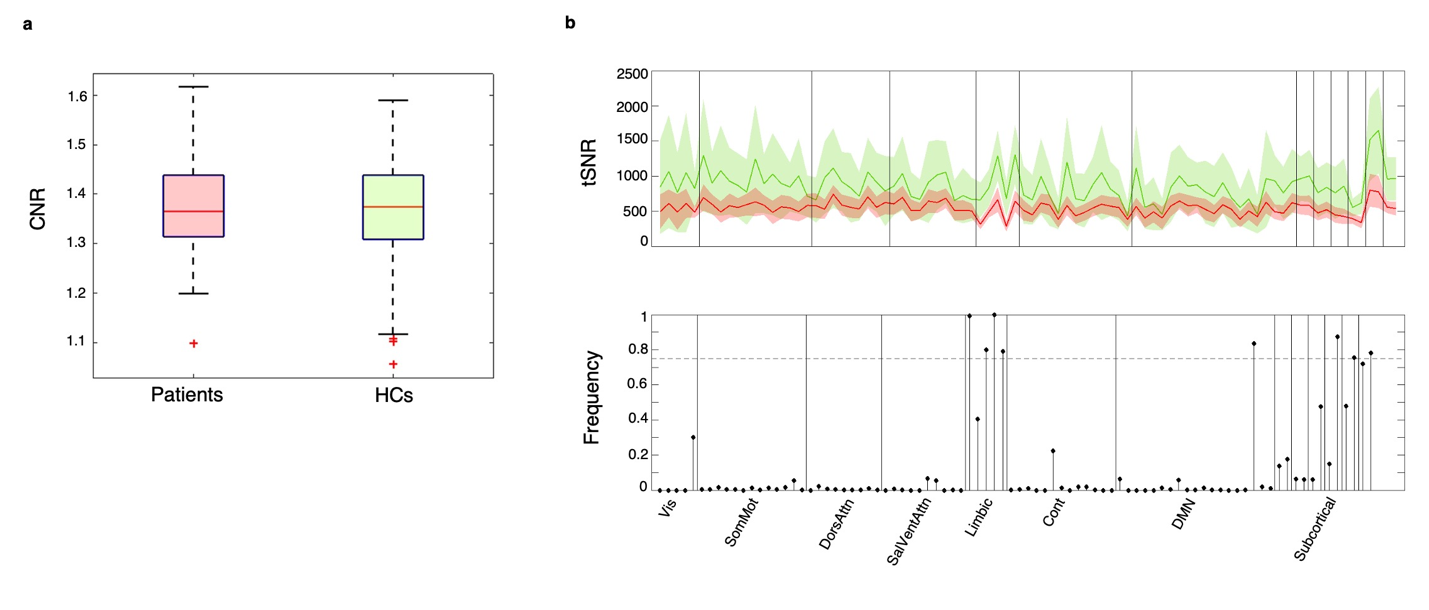
**

**Supplementary Fig. 9 Contrast-to-noise ratio (CNR) for PET data and temporal Signal-to-noise ratio (tSNR) for fMRI data.** (**a**) CNR calculated from individual PET images (static PET 40-60 min) for both population groups (red: patients, green: healthy controls). (**b**) In the upper panel, ROI-wise temporal tSNR curves derived from fMRI data for both population groups (red: patients, green: healthy controls). The solid line represents the mean value across subjects, and the shaded area depicts the standard deviation from the mean. In the lower panel, a stem plot presents the ROI-wise frequency of significant differences in terms of tSNR when comparing subsets from the oncological and control cohorts. The horizontal dashed line marks the threshold corresponding to 75%.


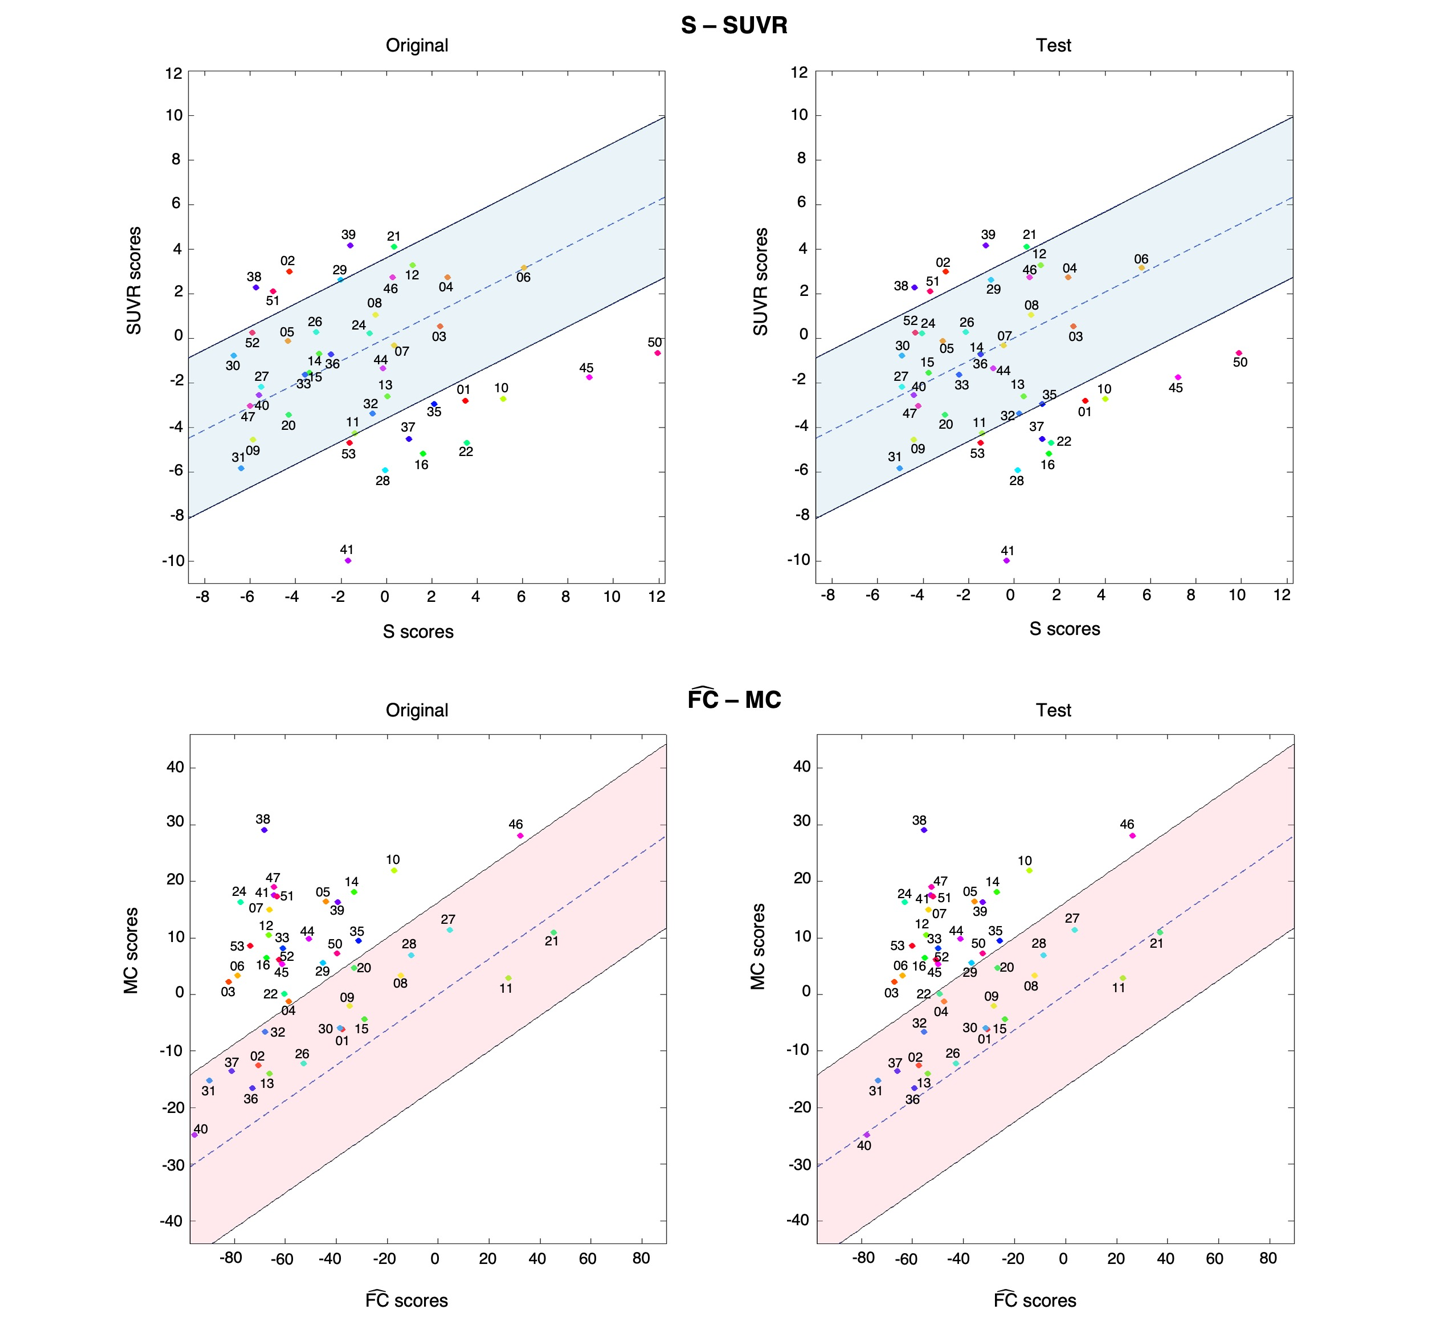


**Supplementary Fig. 10** **Scatterplots depicting original and test latent scores for patients in term of S–SUVR (a) and –MC (b).** Test scatterplots were generated by projecting patients’ latent scores after excluding the contribution of ROIs that exhibited statistically significant differences in terms of tSNR between the two population samples based on fMRI measures. Each color corresponds to a different patient, with their respective ID denoted to illustrate differences in original and test spatial positions on the latent plane.

**Supplementary Results**

The findings from **Supplementary Fig. 6** indicate that the scores of outlier patients seem to be clustered into two distinct groups: above and below the normal range. By analyzing the S-strength and SUVR values (z-scored against healthy controls), different characteristics emerge for these two groups of subjects. Specifically, for S-strength, the values increase when moving from outlier patients above the range (i.e., more prominent receiver behavior) to those below the range (i.e., more prominent transmitter behavior), especially focused on DorsAttn, Cont, Limbic and DMN.

The role of SUVR is also notable. Examining the z-scored values reveals different contributions from certain regions in the two groups. Outlier patients above the range exhibit significantly lower values in the DMN and Cont areas compared to healthy subjects. Conversely, outlier patients below the range show a marked increase in the values of the limbic and subcortical regions compared to healthy controls.

In contrast, the case of and MC (**Supplementary Fig. 7**) shows that all outlier patients share common characteristics, specifically with generally negative scores and positive MC scores. Additionally, the matrices of all outlier patients tend to have lower entries than those of healthy controls, indicating reduced functional integration. Regarding the MC matrices, these also share similar characteristics among patients, with very low values tending towards zero for most networks and higher values (compared to healthy subjects) in the areas involving DorsAttn and subcortical networks.

**Assessment of the impact of different acquisition scanners**

Concerning the potential impact of different acquisition scanners on the results, we have compared CNR and SNR levels between HCs and patients for PET and fMRI measures, respectively. As depicted in **Supplementary Fig. 9a**, the Mann-Whitney rank sum test, applied to compare Contrast-to-Noise Ratio values between the two groups in PET data, did not reveal any significant differences (*p-value* = 0.97). However, an evaluation of the temporal Signal-to-Noise Ratio for fMRI data (**Supplementary Fig. 9b**) exposed some discrepancies, particularly in Limbic areas and certain deep structures such as the hippocampus and cerebellum, which are among the most affected by magnetic susceptibility artefacts23. This observation prompted further investigation into the influence of these differences on the results through an additional test leading to the exclusion of these specific ROIs from the projection of patients onto the functional latent dimension (i.e., discarding the corresponding salience functional weights). Despite the presence of residual differences, as illustrated in **Supplementary Fig. 10**, the spatial dispersion of data points remained largely insensitive to the removal of these ROIs, indicating a negligible effect on the observed decoupling pattern induced by the tumor.

**References**

1. Elam, J. S. *et al.* The Human Connectome Project: A retrospective. *Neuroimage* **244**, 118543 (2021).

2. Yan, X. *et al.* Homotopic local-global parcellation of the human cerebral cortex from resting-state functional connectivity. *Neuroimage* **273**, 120010 (2023).

3. Schaefer, A. *et al.* Local-Global Parcellation of the Human Cerebral Cortex from Intrinsic Functional Connectivity MRI. *Cereb. Cortex* **28**, 3095–3114 (2018).

4. Shivamurthy, V. K. N., Tahari, A. K., Marcus, C. & Subramaniam, R. M. Brain FDG PET and the diagnosis of dementia. *AJR. Am. J. Roentgenol.* **204**, W76–W85 (2015).

5. Prando, G. *et al.* Sparse DCM for whole-brain effective connectivity from resting-state fMRI data. *Neuroimage* **208**, 116367 (2020).

6. D. Benozzo, G.Baggio, G. B. et al. Analyzing asymmetry in brain hierarchies with a linear state-space model of resting-state fMRI data. *bioRxiv* (2023) doi:https://doi.org/10.1101/2023.11.04.565625.

7. Ryali, S., Chen, T., Padmanabhan, A., Cai, W. & Menon, V. Development and validation of consensus clustering-based framework for brain segmentation using resting fMRI. *J. Neurosci. Methods* **240**, 128–140 (2015).

8. Taylor, A. J., Kim, J. H. & Ress, D. Characterization of the hemodynamic response function across the majority of human cerebral cortex. *Neuroimage* **173**, 322–331 (2018).

9. Chen, X. *et al.* Leading basic modes of spontaneous activity drive individual functional connectivity organization in the resting human brain. *Commun. Biol.* **6**, 1–13 (2023).

10. Rousset, O., Rahmim, A., Alavi, A. & Zaidi, H. Partial Volume Correction Strategies in PET. *PET Clin.* **2**, 235–249 (2007).

11. Friston, K. J. *et al.* Parcels and particles: Markov blankets in the brain. *Netw. Neurosci.* **5**, 211–251 (2021).

12. Benozzo, D. *et al.* Analyzing asymmetry in brain hierarchies with a linear state-space model of resting-state fMRI data. *Netw. Neurosci.* 1–42 (2024) doi:10.1162/netn_a_00381.

13. Casti, U. *et al.* Dynamic Brain Networks with Prescribed Functional Connectivity. (2023).

14. Liégeois, R., Santos, A., Matta, V., Van De Ville, D. & Sayed, A. H. Revisiting correlation-based functional connectivity and its relationship with structural connectivity. *Netw. Neurosci.* **4**, 1235–1251 (2020).

15. Das, A. *et al.* Interpretation of the precision matrix and its application in estimating sparse brain connectivity during sleep spindles from human electrocorticography recordings. *Neural Comput.* **29**, 603–642 (2017).

16. Waldorp, L. & Marsman, M. Relations between Networks, Regression, Partial Correlation, and the Latent Variable Model. *Multivariate Behav. Res.* **57**, 994–1006 (2022).

17. Lin, T. W., Das, A., Krishnan, G. P., Bazhenov, M. & Sejnowski, T. J. Differential Covariance: A New Class of Methods to Estimate Sparse Connectivity from Neural Recordings. **2733**, 2709–2733 (2018).

18. Volpi, T. *et al.* A new framework for metabolic connectivity mapping using bolus [ 18 F]FDG PET and kinetic modelling. *J. Cereb. Blood Flow Metab.* 1–21 (2022) doi:10.1177/0271678X231184365.

19. Griffa, A., Amico, E., Liégeois, R., Van De Ville, D. & Preti, M. G. Brain structure-function coupling provides signatures for task decoding and individual fingerprinting. *Neuroimage* **250**, (2022).

20. Krishnan, A., Williams, L. J., McIntosh, A. R. & Abdi, H. Partial Least Squares (PLS) methods for neuroimaging: A tutorial and review. *Neuroimage* **56**, 455–475 (2011).

21. Welvaert, M. & Rosseel, Y. On the definition of signal-to-noise ratio and contrast-to-noise ratio for fMRI data. *PLoS One* **8**, (2013).

22. Thiebaut De Schotten, M. *et al.* Damage to white matter pathways in subacute and chronic spatial neglect: A group study and 2 single-case studies with complete virtual ‘in vivo’ tractography dissection. *Cereb. Cortex* **24**, 691–706 (2014).

23. Aiello, M. *et al.* Relationship between simultaneously acquired resting-state regional cerebral glucose metabolism and functional MRI: A PET/MR hybrid scanner study. *Neuroimage* **113**, 111–121 (2015).
